# Supplementary material
Source: PubMed Central journal article supplement (PMC4475975)
Supplement: pnas.201504090SI.pdf [file pnas.201504090SI.pdf]

# Supporting Information

Garrett et al. 10.1073/pnas.1504090112

## SI Methods

**Participants and Procedure.** Our initial sample consisted of 75 adults, 12 of whom were removed from the final sample due to various data artifacts in the functional images [e.g., ghosting, excessive motion (>4-mm displacement)] or due to incomplete behavioral data.

Blood pressure and pulse were taken immediately before and 30 min after pill ingestion, and immediately before and after the scanning session. Before AMPH ingestion, anyone with blood pressure exceeding 140/90 was not allowed to continue with the study. Following AMPH ingestion, participants whose blood pressure was less than 80/60, exceeded 180/110, or whose pulse exceeded 100 beats per min, would have been precluded from entering the scanner; none in the current sample met any of these exclusionary criteria.

**Data Preparation.** Due to a technical problem with our response box during collection of behavioral data in the scanner, trials were missing at random for some subjects. In such cases, because we could not distinguish between missingness due to this technical problem and due to valid missing responses, we chose to only examine blocks of trials with complete behavioral and corresponding brain data. Subjects in the final sample had to have a minimum of 15 complete behavioral trials within-condition (fixation, 1-, 2-, and 3-back) and within-session (when they received either placebo or AMPH).

**Cognition.** *N*-back performance in the scanner was initially assessed by accuracy (percentage of correct responses, including both hits and correct rejections), and by reaction time means ( $RT_{\text{mean}}$ ) and SDs ( $RT_{\text{SD}}$ ). However, an initial examination of behavioral distributions by age group, drug condition, and task load revealed normal distributions for  $RT_{\text{mean}}$  and  $RT_{\text{SD}}$ , but extremely left-skewed distributions for 1- and 2-back Accuracy in younger adults, and 1-back Accuracy in older adults (one-sample Kolmogorov–Smirnov “tests for normality,”  $P < 0.05$  for all), representing ceiling effects (average young adult, 1-back = 99%, 2-back = 98%; older adult, 1-back = 97%). For this reason, and to maintain an equivalent amount of data for each behavioral measure in our models, all analyses throughout the current study focused only on  $RT_{\text{mean}}$  and  $RT_{\text{SD}}$ . Notably, targeted subsequent examinations of possible links between 3-back-only Accuracy and  $SD_{\text{BOLD}}$  revealed no reliable effects, thus further supporting the focus on  $RT_{\text{mean}}$  and  $RT_{\text{SD}}$  in the current study.

**Extended fMRI Preprocessing.** Beyond standard preprocessing steps (*Methods*), we subsequently examined all functional volumes for artifacts via independent component analysis (ICA) within-run, within-person, as implemented in FSL/MELODIC (1). Noise components were targeted according to several key criteria: (i) Spiking (components dominated by abrupt time series spikes  $\geq 6$  SDs); (ii) motion [prominent edge or “ringing” effects, sometimes (but not always) accompanied by large time series spikes]; (iii) susceptibility and flow artifacts (prominent air–tissue boundary or sinus activation; typically represents cardio/respiratory effects); (iv) white matter (WM) and ventricle activation (2); (v) low-frequency signal drift (3); (vi) high power in high-frequency ranges unlikely to represent neural activity ( $\geq 75\%$  of total spectral power present above 0.13 Hz); and (vii) spatial distribution [“spotty” or “speckled” spatial pattern that appears scattered randomly across  $\geq 25\%$  of the brain, with few if any clusters with  $\geq 10$  contiguous voxels (at 4-mm<sup>3</sup> voxel size)]. Ex-

amples of these various components we typically deem to be noise can be found in the supplementary materials of the study by Garrett et al. (4). By default, we use a conservative set of rejection criteria; if manual classification decisions are difficult due to the co-occurrence of apparent “signal” and “noise” in a single component, we typically elect to keep such components. Two independent raters of noise components were used (D.D.G. and J.M.);  $>90\%$  interrater reliability was required on separate data before denoising decisions were made on the current data. Components identified as artifacts were then regressed from corresponding fMRI runs using the FSL regfilt command. The use of ICA denoising had dramatic effects in our past research, effectively removing 50% of the variance still present after traditional preprocessing steps, while simultaneously doubling the predictive power of BOLD signal variability (5). Thus, calculating BOLD signal variance from relatively artifact-free BOLD time series permits the examination of what is more likely meaningful neural variability.

As a final step to control for the possibility that AMPH may impact BOLD signal variability only by boosting the general physiological responsiveness of the participants, we applied the latest version of single-subject level PHYsiological correction using Canonical Autocorrelation Analysis (PHYCAA+; ref. 6). PHYCAA+ is an automated algorithm that (i) down-weights voxel variance in probable nonneuronal tissue, and (ii) identifies the multivariate physiological noise subspace in gray matter that is linked to nonneuronal tissue. PHYCAA+ thus estimates physiological noise directly from BOLD time series (precluding the need for external measures of heartbeat and respiration) and has recently been shown to outperform various alternative physiological denoising techniques, such as RETROICOR (7), RVHR (8), and COMPCOR (9), at improving both the prediction and reproducibility of resulting activation maps.

**Partial Least-Squares Modeling Details: Analysis of Relations Between Brain Signal Variability ( $SD_{\text{BOLD}}$ ) and AMPH (Pre/Post), Age Group (Younger/Older Adults), and Task Condition (Fixation/1/2/3-Back).** To examine multivariate relations between  $SD_{\text{BOLD}}$ , AMPH, age group, and task condition during *n*-back, we used a Task partial least-squares (PLS) analysis (10, 11). Task PLS begins by calculating a between-subject covariance matrix (COV) between experimental conditions/groups and each voxel’s  $SD_{\text{BOLD}}$ . COV is then decomposed using singular value decomposition (SVD):

$$SVD_{\text{COV}} = USV'. \quad [\text{S1}]$$

This decomposition produces a left singular vector of experimental condition/group weights ( $U$ ), a right singular vector of brain voxel weights ( $V$ ), and a diagonal matrix of singular values ( $S$ ). This analysis produces orthogonal latent variables (LVs) that optimally represent relations between experimental conditions/groups and voxelwise  $SD_{\text{BOLD}}$  values. Each LV contains a spatial activity pattern depicting the brain regions that show the strongest relation to condition/group contrasts identified by the LV. Each voxel weight (in  $V$ ) is proportional to the covariance between voxel  $SD_{\text{BOLD}}$  and the condition/group contrast. In the current study, we had a 2 (AMPH)  $\times$  2 (Age Group)  $\times$  4 (Task Condition) design, yielding a total of 16 possible latent dimensions (i.e., singular values in  $S$ ) that could be estimated.

To obtain a summary measure of each participant’s expression of a particular LV’s spatial pattern, we calculated within-person “brain scores” by multiplying each voxel ( $i$ )’s weight ( $V$ ) from

each LV ( $j$ ) (produced from the SVD in Eq. S1) by voxel ( $i$ )'s  $SD_{BOLD}$  value, for each condition/group ( $k$ ) within person ( $l$ ), and summing over all ( $n$ ) brain voxels:

$$\sum_{i=1}^n V_{ij} SD_{BOLDikl} \quad [S2]$$

This is exactly equivalent to the multiplication of  $V$  by a subject's vector of  $SD_{BOLD}$  values for all voxels. Significance of detected relations between multivariate spatial patterns and conditions/groups was assessed using 1,000 permutation tests of the singular value corresponding to each LV. A subsequent bootstrapping procedure revealed the robustness of voxel saliences across 1,000 bootstrapped resamples of the data (12). By dividing each voxel's mean salience by its bootstrapped SE, we obtained "bootstrap ratios" (BSRs) as normalized estimates of robustness. We thresholded BSRs at a conservative value of  $\pm 4.25$ , which exceeds a 99.99% confidence interval.

To restrict all multivariate analyses to gray matter (GM), we masked our functional data with the GM tissue prior provided in FSL, thresholded at probability  $>0.37$ . We localized thresholded regions from all PLS model output by submitting resulting Montreal Neurological Institute (MNI) coordinates to the Anatomy Toolbox (version 1.8) in SPM8, which applies probabilistic algorithms to determine the cytoarchitectonic labeling of MNI coordinates (13, 14).

#### Mixed Model Details.

**Modeling unique relations between  $SD_{BOLD}$ , AMPH, Age Group, and Task.** The PLS models we specified in the current paper resulted in multivariate, latent-level relations between BOLD, AMPH, Age Group, and Task. Due to their multivariate nature, these models do not explicitly specify the unique importance of each effect in the solution. Subsequent mixed models can help parse these various effects, while flexibly and properly accounting for degrees of freedom and model covariances at within- (i.e., AMPH, Task) and between-subject (i.e., Age Group) levels (15). The PLS model above produced eight brain scores per person [AMPH (placebo vs. drug)  $\times$  Task (fixation, 1/2/3-back)], and these scores became the dependent variables of interest in the mixed models. We then fit a model of the following form:

$$\begin{aligned} SD_{BOLD}BrainScore_{ijk} = & \beta_0 + \beta(AMPH_{jk}) + \beta(Task_{ijk}) \\ & + \beta(Age\ group_k) + \beta(AMPH_{jk} \times Task_{ijk}) \\ & + \beta(AMPH_{jk} \times Age\ group_k) \\ & + \beta(Task_{ijk} \times Age\ group_k) \\ & + \beta(AMPH_{jk} \times Task_{ijk} \times Age\ group_k) \\ & + e_{0ijk}. \end{aligned} \quad [S3]$$

Here, the PLS brain score for each task condition ( $i$ ), AMPH condition ( $j$ ), and participant ( $k$ ) is modeled as a function of a model intercept ( $\beta_0$ ), main effects for AMPH, Task, and Age group, all interactions, and a residual error term ( $e_{0ijk}$ ). We did not include random intercepts and slopes in the final model; when included, model convergence was typically not achieved, likely as a result of modest sample size. All mixed models were run using the Mixed Models module in SPSS 22 (IBM).

**Modeling relations between  $SD_{BOLD}$  and cognitive performance.** Another goal in the current study was to link AMPH-related changes in  $SD_{BOLD}$  to AMPH-related changes in behavior during  $n$ -back (i.e., "change-change" relations). However, average levels of  $SD_{BOLD}$  and behavior may also be uniquely linked (i.e., "level-level" relations). In the current study, key "within" effects represent AMPH-placebo differences, and "between" effects rep-

resent the average of AMPH and placebo. Initially, for behavior (each for  $RT_{mean}$  and  $RT_{SD}$ ) and  $SD_{BOLD}$  (from our PLS brain scores noted above), a total of six scores were available per subject [AMPH (placebo, drug)  $\times$  Task (1/2/3-back)]. These scores permitted the creation of three change scores (AMPH-placebo) and three average scores [(AMPH+placebo)/2], one for each  $n$ -back condition, per variable of interest ( $RT_{mean}$ ,  $RT_{SD}$ , and  $SD_{BOLD}$ ) and subject. We could then fit separate change-change and level-level models.

For the AMPH-related change-change model, we built upon a general model of the following form:

$$Performance\_within_{ij} = \beta_0 + \beta(SD_{BOLD\_within_{ij}}) + \beta_n \dots e_{0ij}. \quad [S4]$$

Here, we model within-person AMPH-related cognitive performance for each  $n$ -back task condition ( $i$ ) and participant ( $j$ ) as a function of a model intercept ( $\beta_0$ ), the AMPH-related  $SD_{BOLD}$  brain score ( $SD_{BOLD\_within_{ij}}$ ), other variables of interest, and residual error,  $e_{0ij}$ .

Subsequently, our level-level models were run as follows:

$$Performance\_between_{ij} = \beta_0 + \beta(SD_{BOLD\_between_{ij}}) + \beta_n \dots e_{0ij}. \quad [S5]$$

Between-person cognitive performance for each  $n$ -back task condition ( $i$ ) and participant ( $j$ ) was modeled as a function of a model intercept ( $\beta_0$ ), the average  $SD_{BOLD}$  brain score across placebo and AMPH conditions ( $SD_{BOLD\_between_{ij}}$ ), other variables of interest, and residual error,  $e_{0ij}$ .

Various specific models used in the current study are outlined in *Results*, and full model results are contained in Table S2. Random intercepts and slopes were again not modeled due to lack of model convergence. For all mixed models outlined above, we chose compound symmetry (CS) as the covariance structure given that Akaike information criteria fits were typically significantly better than for the default diagonal covariance structure, and required fewer parameters to estimate. We also compared CS to the most bias-free available covariance structure (i.e., "unstructured" covariance), and due to a greatly increased number of estimated parameters (e.g., in Table S2, model 1, estimated parameters would have ballooned from 18 to 53) and our modest sample size, we elected to keep CS as our covariance structure. All models were fit using full-information maximum-likelihood estimation.

Model outliers were determined by calculating Cook's distance, which reflects the extent to which model residuals would change if a particular data point (in multivariate space) were excluded from the model. Larger Cook's distance values indicate more influential data points. Single observations exceeding a threshold of 2.5 SDs from the distribution of all multivariate observations were deemed overly influential on model parameters. In our sample, out of 496 total observations (62 subjects  $\times$  4 task conditions  $\times$  2 drug conditions), only two observations were outliers according to Cook's distance. However, mixed models permit missingness without subject-level listwise deletion, maximizing remaining available explanatory power and parameter robustness from the remaining 494 observations.

**Mean<sub>BOLD</sub> Effects.** We sought also to compare  $SD_{BOLD}$  results to a typical mean-based measure of BOLD activity (mean<sub>BOLD</sub>). To calculate mean<sub>BOLD</sub> for each experimental condition, we first expressed each signal value as a percent change from the average of the last four scans from the previous block, and then calculated a mean percent change within each block and averaged across all blocks for a given condition (a typical method in the PLS data analysis framework). This effectively acts as an explicit

high-pass filter over the data. We then reran relevant PLS and mixed models described above, while using mean<sub>BOLD</sub> measures.

**Physiological Component Derivation.** Due to high covariance between pulse and systolic and diastolic blood pressure (BP) measurements, we used principal-component analysis (PCA) to derive a physiological component structure. BP and pulse were collected immediately before and immediately after each scanning session, allowing us to derive within-person (i.e., AMPH-related changes) and between-person (i.e., average across session) levels of these measures (see above for logic). In turn, we ran separate PCAs to create a separate component structure at each level. We found a single component representing the within-person level (eigenvalue, 1.88; systolic BP loading, 0.91; diastolic BP loading, 0.86; pulse loading, 0.56), and a single component representing the between-person level (eigenvalue, 1.88; systolic BP loading, 0.85; diastolic BP loading, 0.90; pulse loading, 0.58). Resulting components were then entered into our mixed models to test whether physiological measures would account for our primary model effects (*Results* in main text and Table S2, model 2).

## SI Results

**Multivariate Model Linking SD<sub>BOLD</sub> to Age Group and Task Within the Placebo Condition Only.** The current BOLD signal variability literature often finds higher cortical signal variability in younger, higher performers (16). However, sometimes (17, 18), but not always (19), subcortical regions exhibit the inverse effect such that SD<sub>BOLD</sub> is higher in older, poorer performers. Our PLS model of SD<sub>BOLD</sub> in the current study (clearly dominated by the AMPH effect on SD<sub>BOLD</sub> in older adults; Fig. 1 and Fig. S2) showed no evidence of inverse effects; all regions were red/yellow, showing higher SD<sub>BOLD</sub> in younger compared with older adults at placebo, and a large increase in SD<sub>BOLD</sub> in older adults on AMPH. To verify that the dominant AMPH effect in older adults was not skewing our results away from possible inverse cortical-subcortical age effects off drug, we reran our PLS model with only placebo data. This ensures the model is more similar in form to previous BOLD signal variability studies (especially to ref. 19, which focused on SD<sub>BOLD</sub> modulations across age groups and task conditions) and ensures that AMPH cannot impact the derivation of any latent dimensions via PLS. These placebo-based results corresponded with the overall model shown in Fig. 1. We found a single robust LV (cross-block covariance, 49.66%; permuted  $P = 0.007$ ) showing that younger adults were again more variable than older adults on every experimental condition (red/yellow regions in Fig. S1), and we found no regions in which older adults were more variable than younger adults. As in our current Fig. 1 and Fig. S2, several cortical and DA-typical subcortical regions (putamen, caudate) remained present. Table S1, model 3, includes peak locations, bootstrap ratio values, and cluster sizes.

**Mixed Models of SD<sub>BOLD</sub> Are Not Driven by Physiological Artifacts.** We took several precautions at the level of image preprocessing to ensure that the present SD<sub>BOLD</sub> results are unlikely to be accounted for by physiological noise (see *SI Methods* for details). First, our ICA denoising procedure explicitly targets and removes cardiac and respiratory components from the fMRI data. Second, we subsequently applied PHYCAA+ (6) as an iterative

procedure to further classify and remove nonneural signal sources remaining after ICA denoising. Finally, we estimated within- and between-person physiological components (derived from systolic/diastolic blood pressure and pulse measures collected immediately before and immediately after each scanning session; see *SI Methods* for details) and added these components (and relevant interactions) to the terms in our initial mixed model (Table S2, model 1). Results revealed no reliable effects of physiological components (Table S2, model 2), and critically, our key AMPH and AMPH  $\times$  Age Group effects noted above were preserved. Thus, in combination with our use of ICA denoising and PHYCAA+, we find no evidence that our primary SD<sub>BOLD</sub> results (Table S2, model 1) are attributable to blood pressure or pulse-related artifacts at within- or between-person levels.

**Behavior-Only Models.** For RT<sub>mean</sub>, we noted significant effects of AMPH, Age Group, AMPH  $\times$  Session Order, Task  $\times$  Age Group, Task  $\times$  Session Order, and a key AMPH  $\times$  Age Group  $\times$  Session Order effect (see Table S2, model 7, for full model results, and Table S3 for descriptive statistics). The three-way interaction is plotted in Fig. S5, *Left*. Inverse placebo-AMPH slopes exists for different session orders in both younger and older adults. Although slope inversion is common to both age groups, the inversion is much more pronounced for YA [AMPH  $\times$  Session Order interaction,  $F_{(1,200)} = 223.08$ ,  $P = 2.23 \times 10^{-34}$ ] than for OA [AMPH  $\times$  Session Order interaction,  $F_{(1,106.15)} = 9.62$ ,  $P = 0.002$ ]. Although Task  $\times$  Age Group and Task  $\times$  Session Order effects were also present, Task did not interact with AMPH. In combination with a lack of Task effects on SD<sub>BOLD</sub> (independent of, or when interacting with, AMPH; Table S2, model 1), this supports the focus on AMPH as the primary within-person dimension linking SD<sub>BOLD</sub> and WM performance in the current study.

For RT<sub>SD</sub>, we found robust effects of Task, Age Group, AMPH  $\times$  Session Order, Task  $\times$  Age Group, and AMPH  $\times$  Age Group  $\times$  Session Order. This three-way interaction is plotted in Fig. S5, *Right*. Here, a strong placebo-AMPH inversion effect existed for different session orders in YA [AMPH  $\times$  Session Order interaction,  $F_{(1,200)} = 63.18$ ,  $P = 1.36 \times 10^{-13}$ ], but far more subtly for OA [AMPH  $\times$  Session Order interaction,  $F_{(1,110)} = 1.27$ ,  $P = 0.26$ ]. Similarly to RT<sub>mean</sub>, we found no interaction between Task and AMPH. See Table S2, model 8, for full model results, and Table S3 for descriptive results.

**Mixed Models of SD<sub>BOLD</sub> Are Not Affected by Session Order Effects.** In our mixed model of SD<sub>BOLD</sub> (AMPH  $\times$  Task  $\times$  Age Group; Table S2, model 1), we showed significant effects of AMPH and AMPH  $\times$  Age Group. Subsequent models predicting reaction time (RT<sub>mean</sub> and RT<sub>SD</sub>) also showed significant effects of Session Order (Table S2, models 3 and 4). To assuage concerns that our original SD<sub>BOLD</sub> model results may also reflect Session Order, we reran model 1 in Table S2 as an AMPH  $\times$  Task  $\times$  Age Group  $\times$  Session Order mixed factorial model predicting SD<sub>BOLD</sub>. We found no effects of Session Order (or any interaction including Session Order) on SD<sub>BOLD</sub> (all values of  $P > 0.53$ ; Table S2, model 10). Notably, our key AMPH and AMPH  $\times$  Age Group effects in the original Table S2, model 1, were fully maintained, with nearly identical  $F$  statistics as before.

- Beckmann CF, Smith SM (2004) Probabilistic independent component analysis for functional magnetic resonance imaging. *IEEE Trans Med Imaging* 23(2):137–152.
- Birn RM (2012) The role of physiological noise in resting-state functional connectivity. *Neuroimage* 62(2):864–870.
- Smith AM, et al. (1999) Investigation of low frequency drift in fMRI signal. *Neuroimage* 9(5):526–533.
- Garrett DD, McIntosh AR, Grady CL (2014) Brain signal variability is parametrically modifiable. *Cereb Cortex* 24(11):2931–2940.
- Garrett DD, Kovacevic N, McIntosh AR, Grady CL (2010) Blood oxygen level-dependent signal variability is more than just noise. *J Neurosci* 30(14):4914–4921.
- Churchill NW, Strother SC (2013) PHYCAA+: An optimized, adaptive procedure for measuring and controlling physiological noise in BOLD fMRI. *Neuroimage* 82:306–325.

- Glover GH, Li T-Q, Ress D (2000) Image-based method for retrospective correction of physiological motion effects in fMRI: RETROICOR. *Magn Reson Med* 44(1):162–167.
- Chang C, Glover GH (2009) Effects of model-based physiological noise correction on default mode network anti-correlations and correlations. *Neuroimage* 47(4):1448–1459.
- Behzadi Y, Restom K, Liu J, Liu TT (2007) A component based noise correction method (CompCor) for BOLD and perfusion based fMRI. *Neuroimage* 37(1):90–101.
- McIntosh AR, Bookstein FL, Haxby JV, Grady CL (1996) Spatial pattern analysis of functional brain images using partial least squares. *Neuroimage* 3(3 Pt 1):143–157.
- Krishnan A, Williams LJ, McIntosh AR, Abdi H (2011) Partial least squares (PLS) methods for neuroimaging: A tutorial and review. *Neuroimage* 56(2):455–475.
- Efron B, Tibshirani R (1993) *An Introduction to the Bootstrap* (Chapman & Hall/CRC, Boca Raton, FL).



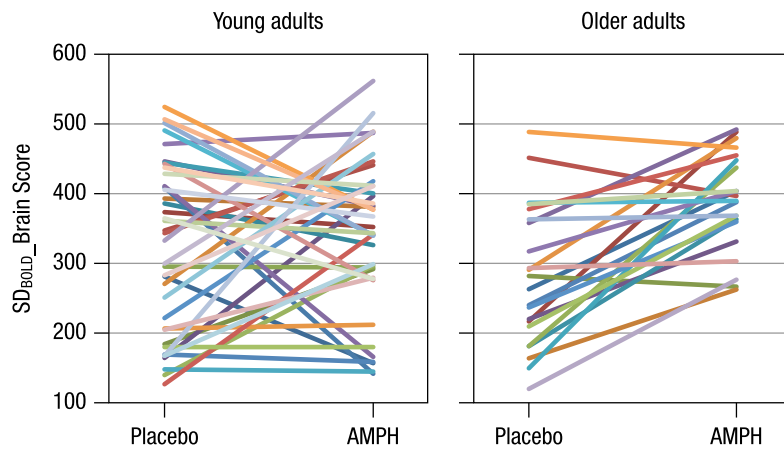

Fig. S3. Individual slopes representing placebo-AMPH shifts in  $SD_{BOLD}$  for young and older adults from an example  $n$ -back condition (2-back).

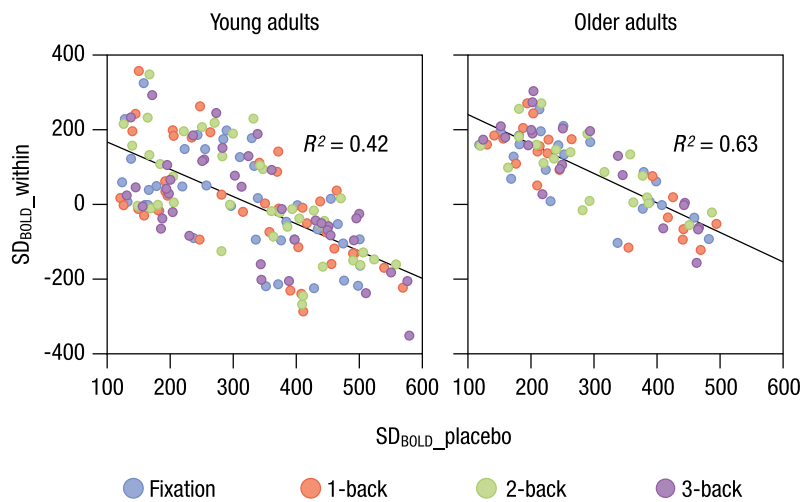

Fig. S4. Baseline (placebo)  $SD_{BOLD}$  negatively correlates with AMPH-related change in  $SD_{BOLD}$ .  $SD_{BOLD\_within}$  (AMPH  $SD_{BOLD}$  – placebo  $SD_{BOLD}$ ). No reliable task condition or session order differences in slope existed for either age group.

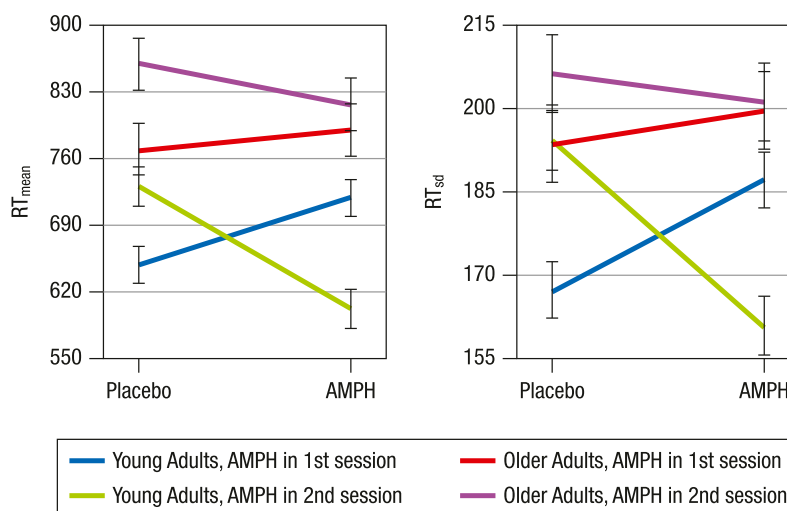

Fig. S5. Average  $n$ -back  $RT_{mean}$  (Left) and  $RT_{SD}$  (Right), by age group and drug session order. Plotted values represent estimated marginal means from the AMPH  $\times$  Age Group  $\times$  Session Order interaction noted in Table S2 (models 7 and 8 for  $RT_{mean}$  and  $RT_{SD}$ , respectively). Error bars represent  $\pm 1$  SE.



**Table S1. PLS model peak activations, bootstrap ratios, and cluster sizes**

| Model                                      | Region                               | Hem                     | MNI coordinates |     |       | BSR    | Cluster size, voxels |       |
|--------------------------------------------|--------------------------------------|-------------------------|-----------------|-----|-------|--------|----------------------|-------|
|                                            |                                      |                         | X               | Y   | Z     |        |                      |       |
| 1                                          | SMA                                  | L                       | -2              | -8  | 74    | 7.18   | 4,783                |       |
| SD <sub>BOLD</sub><br>(Placebo and AMPH)   | Middle temporal gyrus                | R                       | 68              | -32 | -2    | 6.15   | 2,235                |       |
|                                            | Superior temporal gyrus              | L                       | -56             | -30 | 12    | 6.11   | 3,935                |       |
|                                            | Temporal pole                        | L                       | -24             | 6   | -28   | 6.06   | 165                  |       |
|                                            | Middle frontal gyrus                 | R                       | 40              | 34  | 34    | 5.84   | 751                  |       |
|                                            | Calcarine gyrus                      | L                       | -8              | -98 | -8    | 5.83   | 273                  |       |
|                                            | Inferior occipital gyrus             | L                       | -42             | -76 | -14   | 5.8    | 1,182                |       |
|                                            | Superior frontal gyrus               | R                       | 24              | 54  | 8     | 5.8    | 90                   |       |
|                                            | Parahippocampal gyrus                | R                       | 32              | -44 | -6    | 5.77   | 2,014                |       |
|                                            | Middle temporal gyrus                | L                       | -56             | -4  | -22   | 5.65   | 301                  |       |
|                                            | Postcentral gyrus                    | R                       | 48              | -28 | 44    | 5.48   | 678                  |       |
|                                            | Fusiform gyrus                       | L                       | -28             | -32 | -24   | 5.45   | 169                  |       |
|                                            | Angular gyrus                        | L                       | -48             | -66 | 24    | 5.43   | 312                  |       |
|                                            | Putamen                              | L                       | -22             | 10  | 10    | 5.32   | 133                  |       |
|                                            | Superior frontal gyrus               | R                       | 28              | 6   | 62    | 5.27   | 121                  |       |
|                                            | Calcarine gyrus                      | R                       | 8               | -76 | 16    | 5.21   | 110                  |       |
|                                            | Insula lobe                          | R                       | 46              | 16  | -4    | 5.17   | 515                  |       |
|                                            | Calcarine gyrus                      | L                       | -22             | -60 | 6     | 5.15   | 108                  |       |
|                                            | Middle cingulate cortex              | L                       | -6              | -14 | 44    | 5.04   | 494                  |       |
|                                            | Middle frontal gyrus                 | L                       | -44             | 32  | 34    | 5.02   | 194                  |       |
|                                            | Anterior cingulate cortex            | R                       | 4               | 30  | 28    | 4.92   | 425                  |       |
| Insula lobe                                | R                                    | 40                      | -8              | 12  | 4.72  | 95     |                      |       |
| 2                                          | Angular gyrus                        | L                       | -54             | -66 | 30    | 10.9   | 711                  |       |
| Mean <sub>BOLD</sub><br>(Placebo and AMPH) | Posterior cingulate cortex           | L                       | -2              | -54 | 24    | 10.41  | 4,572                |       |
|                                            | Superior medial gyrus                | L                       | 0               | 60  | 0     | 10.39  | 2,480                |       |
|                                            | Superior frontal gyrus               | L                       | -14             | 52  | 42    | 7.43   | 993                  |       |
|                                            | Parahippocampal gyrus                | L                       | -24             | -14 | -26   | 6.45   | 141                  |       |
|                                            | Middle temporal gyrus                | L                       | -64             | -12 | -20   | 6.08   | 396                  |       |
|                                            | Middle occipital gyrus               | R                       | 52              | -70 | 28    | 5.77   | 93                   |       |
|                                            | Parahippocampal gyrus                | R                       | 22              | -16 | -26   | 5.48   | 328                  |       |
|                                            | Middle temporal gyrus                | R                       | 62              | -10 | -16   | 5.11   | 110                  |       |
|                                            | Superior temporal gyrus              | R                       | 66              | -18 | 6     | 4.87   | 166                  |       |
|                                            | Precentral gyrus                     | L                       | -42             | -18 | 62    | -18.69 | 25,253               |       |
|                                            | Inferior occipital gyrus             | L                       | -38             | -84 | -8    | -17.32 | 4,274                |       |
|                                            | Inferior occipital gyrus             | R                       | 34              | -90 | -10   | -17.17 | 4,293                |       |
|                                            | Precentral gyrus                     | R                       | 46              | 6   | 30    | -11.74 | 3,498                |       |
|                                            | Superior parietal lobule             | R                       | 36              | -56 | 54    | -10.46 | 3,772                |       |
|                                            | Insula lobe                          | R                       | 34              | 22  | 0     | -9.33  | 2,428                |       |
|                                            | 3                                    | Precuneus               | L               | -8  | -48   | 76     | -7.29                | 9,426 |
|                                            | SD <sub>BOLD</sub><br>(Placebo only) | Cerebellar vermis       | R               | 6   | -48   | 2      | -5.21                | 2,135 |
|                                            |                                      | Thalamus                | L               | -6  | -6    | -2     | -4.97                | 175   |
|                                            |                                      | Superior temporal gyrus | L               | -62 | -38   | 20     | -4.9                 | 1,678 |
|                                            |                                      | Superior temporal gyrus | R               | 64  | -16   | 8      | -4.78                | 671   |
| Middle temporal gyrus                      |                                      | R                       | 54              | -66 | 22    | -4.63  | 512                  |       |
| Thalamus                                   |                                      | L                       | -4              | -14 | 14    | -4.33  | 373                  |       |
| Calcarine gyrus                            |                                      | L                       | -2              | -84 | -12   | -4.11  | 615                  |       |
| Temporal pole                              |                                      | L                       | -42             | 16  | -22   | -4.04  | 149                  |       |
| Posterior cingulate                        |                                      | L                       | -2              | -46 | 24    | -4     | 137                  |       |
| Fusiform gyrus                             |                                      | R                       | 34              | -42 | -12   | -3.96  | 136                  |       |
| Postcentral gyrus                          |                                      | R                       | 58              | -10 | 40    | -3.62  | 114                  |       |
| Supplementary motor area                   |                                      | L                       | 0               | 0   | 48    | -3.6   | 83                   |       |
| Inferior frontal gyrus                     | L                                    | -42                     | 12              | 18  | -3.52 | 90     |                      |       |

Note: BOLD, blood oxygen level dependent; BSR, bootstrap ratio (model salience/bootstrapped SE); Hem, hemisphere; MNI, Montreal Neurological Institute.

**Table S2. Mixed-model results**

| Model | Dependent variable         | Predictor                                              | df1 | df2    | F      | P                              |
|-------|----------------------------|--------------------------------------------------------|-----|--------|--------|--------------------------------|
| 1     | SD <sub>BOLD</sub>         | AMPH                                                   | 1   | 429.97 | 52.80  | <b>1.75 × 10<sup>-12</sup></b> |
|       |                            | Task                                                   | 3   | 430.46 | 1.08   | 0.36                           |
|       |                            | Age Group                                              | 1   | 62.06  | 0.08   | 0.79                           |
|       |                            | AMPH × Task                                            | 3   | 429.97 | 0.16   | 0.92                           |
|       |                            | AMPH × Age Group                                       | 1   | 429.97 | 42.15  | <b>2.33 × 10<sup>-10</sup></b> |
|       |                            | Task × Age Group                                       | 3   | 430.46 | 0.29   | 0.83                           |
| 2     | SD <sub>BOLD</sub>         | AMPH × Task × Age Group                                | 3   | 429.97 | 0.19   | 0.91                           |
|       |                            | AMPH                                                   | 1   | 429.99 | 30.80  | <b>5.00 × 10<sup>-08</sup></b> |
|       |                            | Task                                                   | 3   | 430.47 | 1.09   | 0.35                           |
|       |                            | Age Group                                              | 1   | 61.94  | 3.14   | 0.08                           |
|       |                            | AMPH × Task                                            | 3   | 429.99 | 0.14   | 0.94                           |
|       |                            | AMPH × Age Group                                       | 1   | 429.99 | 12.31  | <b>4.98 × 10<sup>-04</sup></b> |
|       |                            | Task × Age Group                                       | 3   | 430.47 | 0.30   | 0.83                           |
|       |                            | AMPH × Task × Age Group                                | 3   | 429.99 | 0.19   | 0.91                           |
|       |                            | AMPH × Physio_within                                   | 2   | 107.31 | 2.44   | 0.09                           |
|       |                            | AMPH × Age Group × Physio_within                       | 2   | 107.31 | 1.85   | 0.16                           |
|       |                            | Physio_between                                         | 1   | 62.24  | 2.84   | 0.10                           |
| 3     | RT <sub>mean_within</sub>  | AMPH × Physio_between                                  | 1   | 429.99 | 0.01   | 0.95                           |
|       |                            | Age Group × Physio_between                             | 1   | 62.24  | 0.41   | 0.53                           |
|       |                            | AMPH × Age Group × Physio_between                      | 1   | 429.99 | 1.26   | 0.26                           |
|       |                            | Age Group                                              | 1   | 70.03  | 2.24   | 0.14                           |
|       |                            | Session Order                                          | 1   | 70.03  | 109.60 | <b>5.71 × 10<sup>-16</sup></b> |
|       |                            | SD <sub>BOLD_within</sub>                              | 1   | 95.57  | 0.39   | 0.54                           |
|       |                            | Age Group × Session Order                              | 1   | 70.03  | 7.89   | <b>0.01</b>                    |
|       |                            | Age Group × SD <sub>BOLD_within</sub>                  | 1   | 95.57  | 1.80   | 0.18                           |
|       |                            | Session Order × SD <sub>BOLD_within</sub>              | 1   | 95.57  | 11.22  | <b>0.001</b>                   |
|       |                            | Age Group × Session Order × SD <sub>BOLD_within</sub>  | 1   | 95.57  | 4.72   | <b>0.03</b>                    |
| 4     | RT <sub>SD_within</sub>    | Age Group                                              | 1   | 67.36  | 5.01   | <b>0.03</b>                    |
|       |                            | Session Order                                          | 1   | 67.36  | 40.61  | <b>1.94 × 10<sup>-08</sup></b> |
|       |                            | SD <sub>BOLD_within</sub>                              | 1   | 81.97  | 2.08   | 0.15                           |
|       |                            | Age Group × Session Order                              | 1   | 67.36  | 1.38   | 0.25                           |
|       |                            | Age Group × SD <sub>BOLD_within</sub>                  | 1   | 81.97  | 4.57   | <b>0.04</b>                    |
|       |                            | Session Order × SD <sub>BOLD_within</sub>              | 1   | 81.97  | 5.96   | <b>0.02</b>                    |
|       |                            | Age Group × Session Order × SD <sub>BOLD_within</sub>  | 1   | 81.97  | 7.31   | <b>0.01</b>                    |
|       |                            | Age Group                                              | 1   | 93.67  | 9.52   | <b>0.003</b>                   |
| 5     | RT <sub>mean_between</sub> | Session Order                                          | 1   | 93.67  | 0.07   | 0.79                           |
|       |                            | SD <sub>BOLD_between</sub>                             | 1   | 93.67  | 1.76   | 0.19                           |
|       |                            | Age Group × Session Order                              | 1   | 93.67  | 2.74   | 0.10                           |
|       |                            | Age Group × SD <sub>BOLD_between</sub>                 | 1   | 93.67  | 2.87   | 0.09                           |
|       |                            | Session Order × SD <sub>BOLD_between</sub>             | 1   | 93.67  | 0.00   | 1.00                           |
|       |                            | Age Group × Session Order × SD <sub>BOLD_between</sub> | 1   | 93.67  | 1.70   | 0.20                           |
|       |                            | Age Group                                              | 1   | 78.04  | 4.99   | <b>0.03</b>                    |
| 6     | RT <sub>SD_between</sub>   | Session Order                                          | 1   | 78.04  | 0.18   | 0.67                           |
|       |                            | SD <sub>BOLD_between</sub>                             | 1   | 76.16  | 0.61   | 0.44                           |
|       |                            | Age Group × Session Order                              | 1   | 78.04  | 0.01   | 0.92                           |
|       |                            | Age Group × SD <sub>BOLD_between</sub>                 | 1   | 76.16  | 2.15   | 0.15                           |
|       |                            | Session Order × SD <sub>BOLD_between</sub>             | 1   | 76.16  | 0.34   | 0.57                           |
|       |                            | Age Group × Session Order × SD <sub>BOLD_between</sub> | 1   | 76.16  | 0.03   | 0.85                           |
|       |                            | AMPH                                                   | 1   | 306.11 | 11.74  | <b>0.001</b>                   |
|       |                            | Task                                                   | 2   | 306.67 | 223.20 | <b>1.90 × 10<sup>-60</sup></b> |
| 7     | RT <sub>mean</sub>         | Age Group                                              | 1   | 62.23  | 33.67  | <b>2.37 × 10<sup>-7</sup></b>  |
|       |                            | Session Order                                          | 1   | 62.23  | 0.81   | 0.37                           |
|       |                            | AMPH × Task                                            | 2   | 306.11 | 0.49   | 0.61                           |
|       |                            | AMPH × Age Group                                       | 1   | 306.11 | 2.50   | 0.12                           |
|       |                            | AMPH × Session Order                                   | 1   | 306.11 | 125.19 | <b>1.36 × 10<sup>-24</sup></b> |
|       |                            | Task × Age Group                                       | 2   | 306.67 | 13.03  | <b>4.00 × 10<sup>-6</sup></b>  |
|       |                            | Task × Session Order                                   | 2   | 306.67 | 4.65   | <b>0.01</b>                    |
|       |                            | Age Group × Session Order                              | 1   | 62.23  | 2.66   | 0.11                           |
|       |                            | AMPH × Task × Age Group                                | 2   | 306.11 | 0.68   | 0.51                           |
|       |                            | AMPH × Task × Session Order                            | 2   | 306.11 | 0.21   | 0.81                           |
|       |                            | AMPH × Age Group × Session Order                       | 1   | 306.11 | 34.96  | <b>9.00 × 10<sup>-9</sup></b>  |
|       |                            | Task × Age Group × Session Order                       | 2   | 306.67 | 1.26   | 0.29                           |
|       |                            | AMPH × Task × Age Group × Session Order                | 2   | 306.11 | 1.26   | 0.28                           |



Table S2. Cont.

| Model                                   | Dependent variable   | Predictor                               | df1  | df2    | F      | P                              |
|-----------------------------------------|----------------------|-----------------------------------------|------|--------|--------|--------------------------------|
| 8                                       | RT <sub>SD</sub>     | AMPH                                    | 1    | 310.00 | 1.19   | 0.28                           |
|                                         |                      | Task                                    | 2    | 310.00 | 334.67 | <b>3.69 × 10<sup>-78</sup></b> |
|                                         |                      | Age Group                               | 1    | 62.00  | 17.69  | <b>8.50 × 10<sup>-5</sup></b>  |
|                                         |                      | Session Order                           | 1    | 62.00  | 0.47   | 0.50                           |
|                                         |                      | AMPH × Task                             | 2    | 310.00 | 0.01   | 0.99                           |
|                                         |                      | AMPH × Age Group                        | 1    | 310.00 | 1.56   | 0.21                           |
|                                         |                      | AMPH × Session Order                    | 1    | 310.00 | 30.61  | <b>6.73 × 10<sup>-8</sup></b>  |
|                                         |                      | Task × Age Group                        | 2    | 310.00 | 20.40  | <b>4.74 × 10<sup>-9</sup></b>  |
|                                         |                      | Task × Session Order                    | 2    | 310.00 | 0.32   | 0.73                           |
|                                         |                      | Age Group × Session Order               | 1    | 62.00  | 0.39   | 0.54                           |
|                                         |                      | AMPH × Task × Age Group                 | 2    | 310.00 | 0.69   | 0.50                           |
|                                         |                      | AMPH × Task × Session Order             | 2    | 310.00 | 1.37   | 0.26                           |
|                                         |                      | AMPH × Age Group × Session Order        | 1    | 310.00 | 13.05  | <b>3.54 × 10<sup>-4</sup></b>  |
|                                         |                      | Task × Age Group × Session Order        | 2    | 310.00 | 0.83   | 0.44                           |
| 9                                       | Mean <sub>BOLD</sub> | AMPH × Task × Age Group × Session Order | 2    | 310.00 | 0.58   | 0.56                           |
|                                         |                      | AMPH                                    | 1    | 434.00 | 0.24   | 0.63                           |
|                                         |                      | Task                                    | 3    | 434.00 | 104.69 | <b>5.32 × 10<sup>-51</sup></b> |
|                                         |                      | Age Group                               | 1    | 62.00  | 0.41   | 0.53                           |
|                                         |                      | AMPH × Task                             | 3    | 434.00 | 1.08   | 0.36                           |
|                                         |                      | AMPH × Age Group                        | 1    | 434.00 | 0.04   | 0.84                           |
| 10                                      | SD <sub>BOLD</sub>   | Task × Age Group                        | 3    | 434.00 | 0.93   | 0.43                           |
|                                         |                      | AMPH × Task × Age Group                 | 3    | 434.00 | 0.72   | 0.54                           |
|                                         |                      | AMPH                                    | 1    | 429.96 | 53.46  | <b>1.30 × 10<sup>-12</sup></b> |
|                                         |                      | Task                                    | 3    | 430.46 | 1.10   | 0.35                           |
|                                         |                      | Age Group                               | 1    | 62.07  | 0.09   | 0.77                           |
|                                         |                      | Session Order                           | 1    | 62.07  | 0.02   | 0.90                           |
|                                         |                      | AMPH × Task                             | 3    | 429.96 | 0.14   | 0.94                           |
|                                         |                      | AMPH × Age Group                        | 1    | 429.96 | 41.90  | <b>2.63 × 10<sup>-10</sup></b> |
|                                         |                      | AMPH × Session Order                    | 1    | 429.96 | 0.39   | 0.53                           |
|                                         |                      | Task × Age Group                        | 3    | 430.46 | 0.30   | 0.83                           |
| Task × Session Order                    | 3                    | 430.46                                  | 0.30 | 0.83   |        |                                |
| Age Group × Session Order               | 1                    | 62.07                                   | 0.32 | 0.57   |        |                                |
| AMPH × Task × Age Group                 | 3                    | 429.96                                  | 0.20 | 0.90   |        |                                |
| AMPH × Task × Session Order             | 3                    | 429.96                                  | 0.29 | 0.83   |        |                                |
| AMPH × Age Group × Session Order        | 1                    | 429.96                                  | 0.35 | 0.55   |        |                                |
| Task × Age Group × Session Order        | 3                    | 430.46                                  | 0.03 | 0.99   |        |                                |
| AMPH × Task × Age Group × Session Order | 3                    | 429.96                                  | 0.38 | 0.77   |        |                                |

Note: AMPH, amphetamine; RT<sub>mean\_within</sub>, (AMPH RT<sub>mean</sub> – placebo RT<sub>mean</sub>); RT<sub>SD\_within</sub>, (AMPH RT<sub>SD</sub> – placebo RT<sub>SD</sub>); SD<sub>BOLD\_within</sub>, (AMPH SD<sub>BOLD</sub> – placebo SD<sub>BOLD</sub>). Significant effects are highlighted in bold.
